# Supplementary material for: Semi-transparent all-oxide ultraviolet light-emitting diodes based on ZnO/NiO-core/shell nanowires
Source: Royal Society of Chemistry journal article supplement (doi:10.1039/c5nr07236k), 2015-11-19
Supplement: c5nr07236k1.pdf [file c5nr07236k1.pdf]

SUPPORTING INFORMATION

Semitransparent all-oxide ultraviolet light-emitting diodes based  
on ZnO/NiO-core/shell nanowires

Zhi-Feng Shi,<sup>a</sup> Ting-Ting Xu,<sup>a</sup> Di Wu,<sup>a</sup> Yuan-Tao Zhang,<sup>b</sup> Bao-Lin Zhang,<sup>b</sup> Yong-Tao Tian,<sup>a</sup>  
Xin-Jian Li\*<sup>a</sup> and Guo-Tong Du\*<sup>b</sup>

<sup>a</sup>Department of Physics and Laboratory of Material Physics, Zhengzhou University, Zhengzhou  
450052, China

<sup>b</sup>State Key Laboratory on Integrated Optoelectronics, College of Electronic Science and  
Engineering, Jilin University, Qianjin Street 2699, Changchun 130012, China

---

<sup>a</sup>) Author to whom correspondence should be addressed. Electronic mail: [lixj@zzu.edu.cn](mailto:lixj@zzu.edu.cn), [laserlab@jlu.edu.cn](mailto:laserlab@jlu.edu.cn)

## Ohmic contact behaviors of ITO and In electrodes on p-NiO and n-ZnO

Figure S1 shows the  $I$ - $V$  characteristics of p-NiO and n-ZnO layers in contact with ITO and In electrodes, respectively. The Ohmic contact behaviors are confirmed by the fairly linear  $I$ - $V$  dependencies.

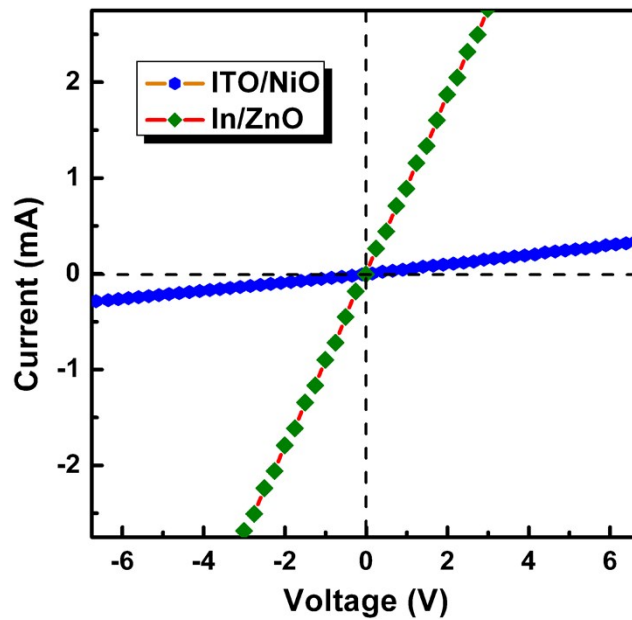

Figure S1. Ohmic contact behaviors of ITO and In electrodes on p-NiO and n-ZnO, respectively.
